# Supplementary material for: Structures of the junctophilin/voltage-gated calcium channel interface reveal hot spot for cardiomyopathy mutations
Source: PubMed Central journal article supplement — Proc Natl Acad Sci U S A. 2022 Mar 1;119(10):e2120416119. doi: 10.1073/pnas.2120416119 (PMC8916002; doi:10.1073/pnas.2120416119), 2022-03-01
Supplement: pnas.2120416119.sapp.pdf [file pnas.2120416119.sapp.pdf]

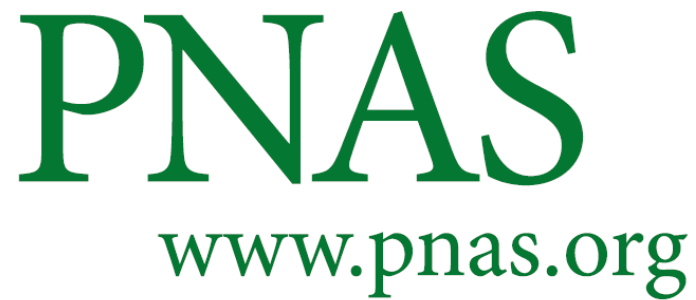

**Supplementary Information for**

Structures of the junctophilin – voltage-gated calcium channel interface reveal hot spot for cardiomyopathy mutations.

Zheng Fang Yang, Pankaj Panwar, Ciaran R. McFarlane, Wietske Elisabeth Tuinte, Marta Campiglio, Filip Van Petegem

Filip Van Petegem  
Email: [petegem@mail.ubc.ca](mailto:petegem@mail.ubc.ca)

**This PDF file includes:**

Figures S1 to S6  
Tables S1 to S8

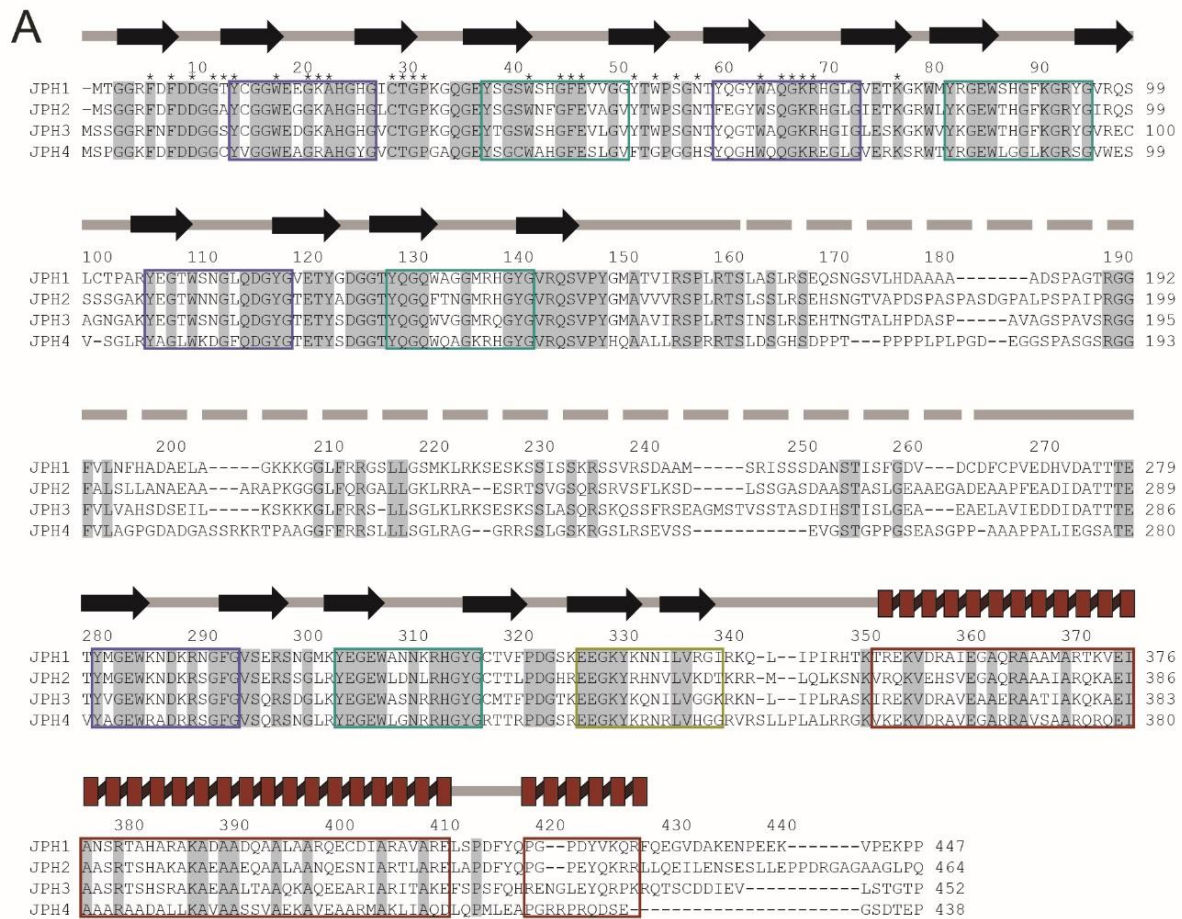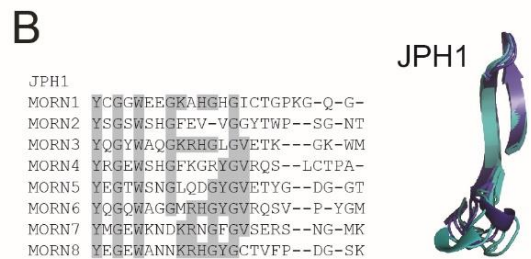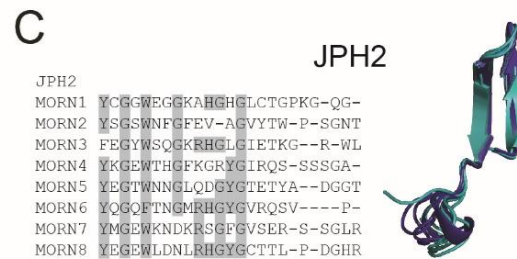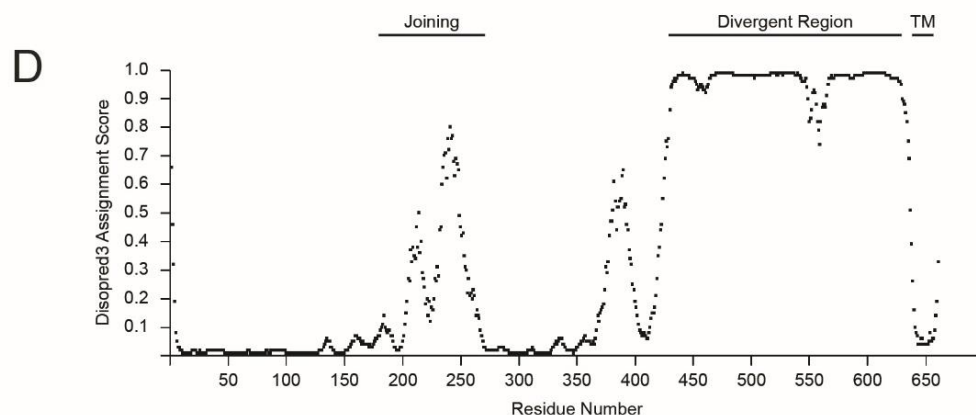

**Fig. S1. Sequence alignments** (A) The sequence alignment of the N-terminal region of human JPH1-JPH4, with conserved residues between all 4 isoforms highlighted in grey. The deleted linker region in JPH1 and JPH2 are shown in dashes. The secondary elements of the crystal structures are shown above the sequences, while the MORN consensus sequences are boxed in the same colors as Figure 1A-C. JPH2 residues within 4.5Å from the Cav1.1 peptide in the co-crystal structure are starred above the sequences. Most of these are conserved among all JPH isoforms. The Uniprot IDs for the aligned sequences are: JPH1: Q9HDC5; JPH2: Q9BR39; JPH3: Q8WXH2; JPH4: Q96JJ6. (B) and (C) the structure-based sequence alignments of the 8 MORN repeats from JPH1 and JPH2, along with a structural superposition of these repeats, showing a remarkable structural similarity. (D) The Disopred3 plot of the full JPH1 sequence, with higher values corresponding to higher likelihood of being intrinsically disordered.

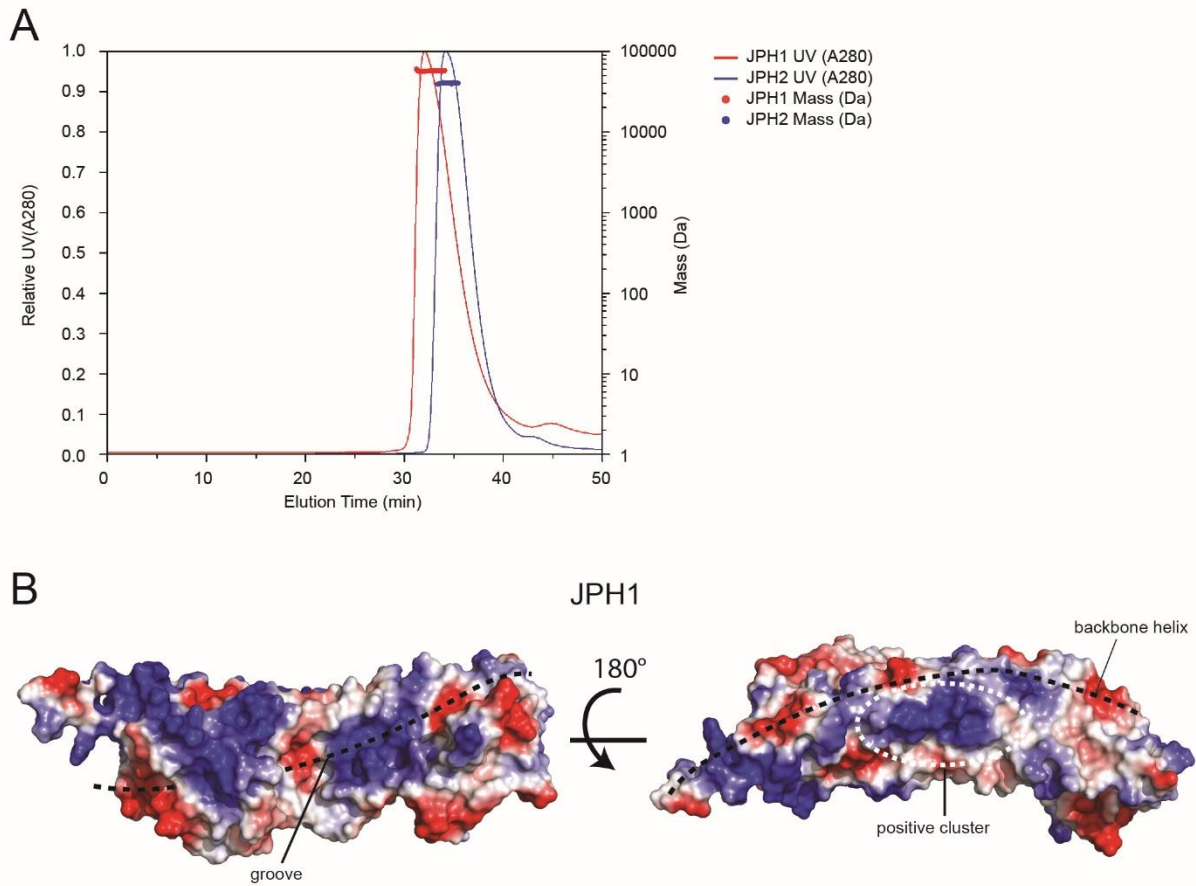

**Fig. S2. Size and charge profile of Junctophilin.** (A) The elution profile of JPH1 and JPH2 MORN-helical domain and predicted molecular weight based on SEC-MALS. Values are reported in table S3. Based on sequence, the expected molecular weight for a JPH1(1-442) containing a C-terminal strep tag is 49.8 kDa; the expected molecular weight of JPH2(1-437) is 47.2kDa. The SEC chromatogram and the estimated molecular weight based on light scattering for JPH1 and JPH2 are shown in red and blue respectively, which suggest monomeric forms for both in solution. (B) Surface electrostatic potential generated for JPH1 in 2 orientations, similar to Figure 1D,E for JPH2.

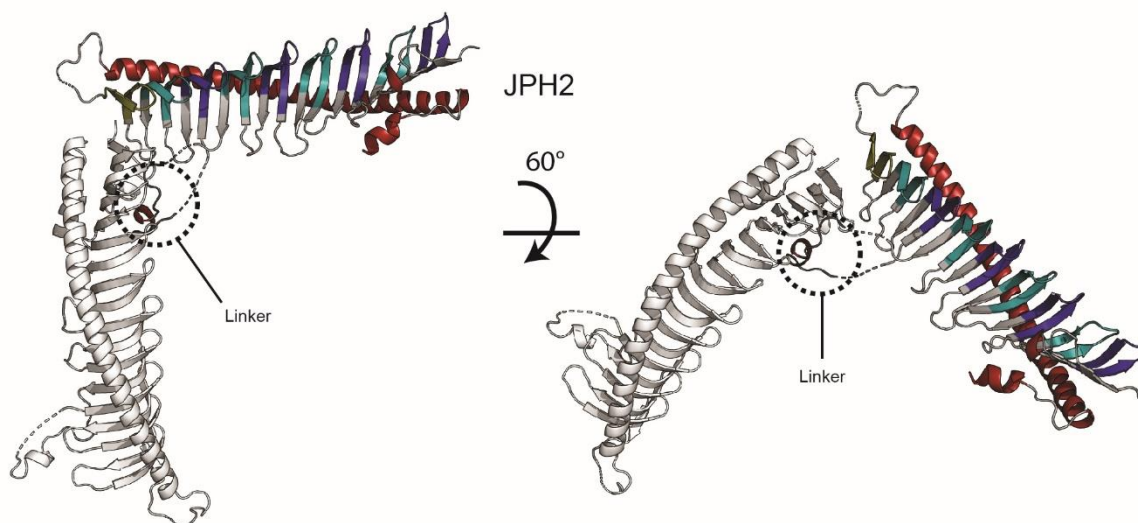

**Fig. S3. The shortened linker of JPH2 forms crystal contacts with a neighboring asymmetric unit.** One asymmetric unit of JPH2 is colored according to Figure 1A-C, the shortened linker region is colored in black and interacts with a neighboring asymmetric unit which is colored in white. Regardless of this observed crystal contact, no dimeric interactions are observed via SEC-MALS, so this likely only arises in the context of the crystal.

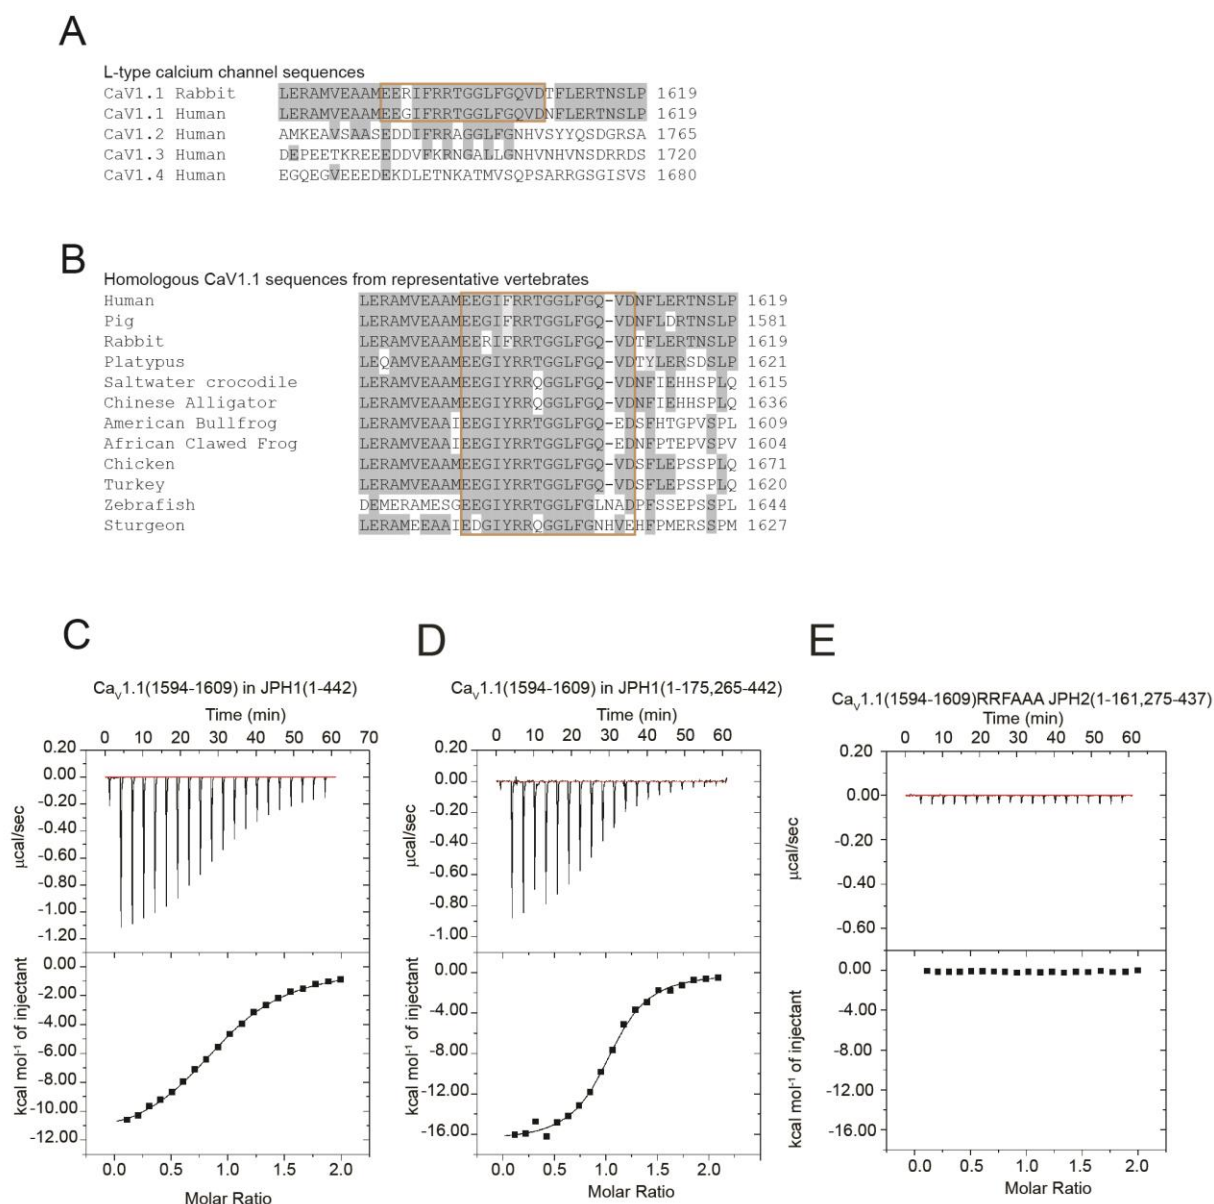

**Fig. S4: The sequence alignments of rabbit Ca<sub>v</sub>1.1 and human Ca<sub>v</sub>1.1-1.4, and sequence alignments of Ca<sub>v</sub>1.1 from diverse vertebrates. (A)** Rabbit Ca<sub>v</sub>1.1 and human Ca<sub>v</sub>1.1-1.4 sequences are aligned with Clustal Omega, and the interaction site with JPH is shown (orange box) with 10 upstream and downstream residues. Conserved residues to rabbit Ca<sub>v</sub>1.1 are highlighted in grey. The Uniprot IDs for the aligned sequences are: rCa<sub>v</sub>1.1: P07293; hCa<sub>v</sub>1.1: Q13698; hCa<sub>v</sub>1.2: Q13936; hCa<sub>v</sub>1.3: Q01668; hCa<sub>v</sub>1.4: O60840. **(B)** Ca<sub>v</sub>1.1 sequences from 12 representative vertebrates are aligned with Clustal Omega, and the peptide interacting with JPHs is shown (orange box), along with 10 upstream and downstream residues. Conserved residues are highlighted in grey. The Uniprot IDs for the Ca<sub>v</sub>1.1 sequences are: human: Q13698; rabbit: P07293; pig: A0A5G2QW60; platypus: F7DM66; saltwater crocodile: A0A7M4EDG7; Chinese alligator: A0A3Q0FSH7; American bullfrog: O57483; African clawed frog: A0A1L8H6Q1; chicken: A0A1D5PV02; turkey: G1MQJ3; zebrafish: Q6RKB0; sturgeon: E7EAV0. **(C)** ITC of 600 μM Ca<sub>v</sub>1.1 peptide into 60 μM JPH1 (1-442) containing the joining region ( $K_d = 7.9 \mu\text{M}$ ). **(D)** ITC of 300 μM Ca<sub>v</sub>1.1 peptide into 28 μM JPH1 (1-175, 265-442) lacking most of the joining region ( $K_d = 1.1 \mu\text{M}$ ) **(E)** ITC of 300 μM RRF/AAA mutant Ca<sub>v</sub>1.1 peptide into 30 μM JPH2 (1-161,275-437), showing no significant heats different from background.

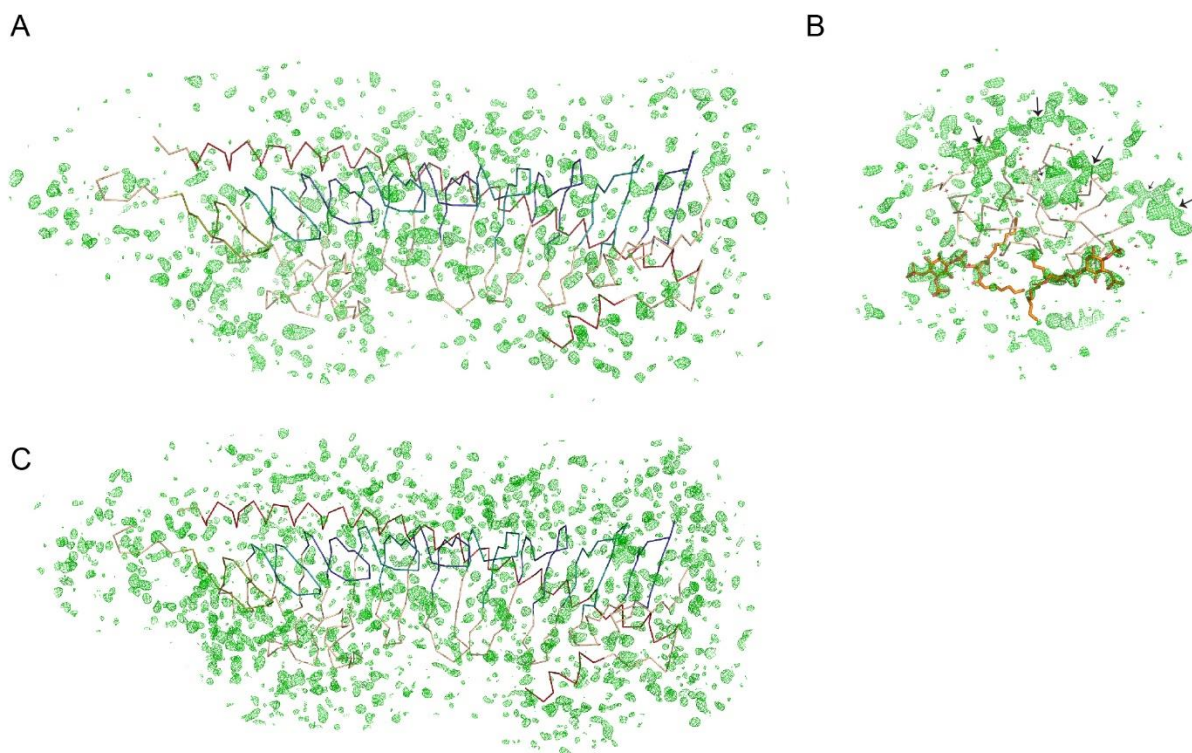

**Fig. S5: Absence of density for lipids in JPH1 crystals.** (A) Fo-Fc difference density map (green) for a 2.0Å dataset of a JPH1 crystal grown in the presence of 500μM 8:0 PI(4,5)P<sub>2</sub>. The map is contoured at 2.5σ, with the model of JPH1 shown in Cα trace. Even at this threshold, only noise peaks are visible. (B) Reference Fo-Fc difference density map for 8:0 PI(4,5)P<sub>2</sub> bound to human β-defensin 2 (PDB ID 6CS9). The difference map was generated after removal of PIP2 from the model, and contoured at 2.5σ. The ribbon represents a Cα trace model of the protein, with the sticks indicating two PIP2 molecules. Electron densities for symmetry-related PIP2 molecules are also visible above (arrows). The zoom level is the same as in panel A, showing that similar densities are not observed for JPH1. (C) Fo-Fc difference density map (green) for a 1.9Å dataset of JPH1 crystal grown in the presence of 2mM 6:0 phosphatidylserine, contoured at 2.5σ. No density is observed that could readily fit a phosphatidylserine.

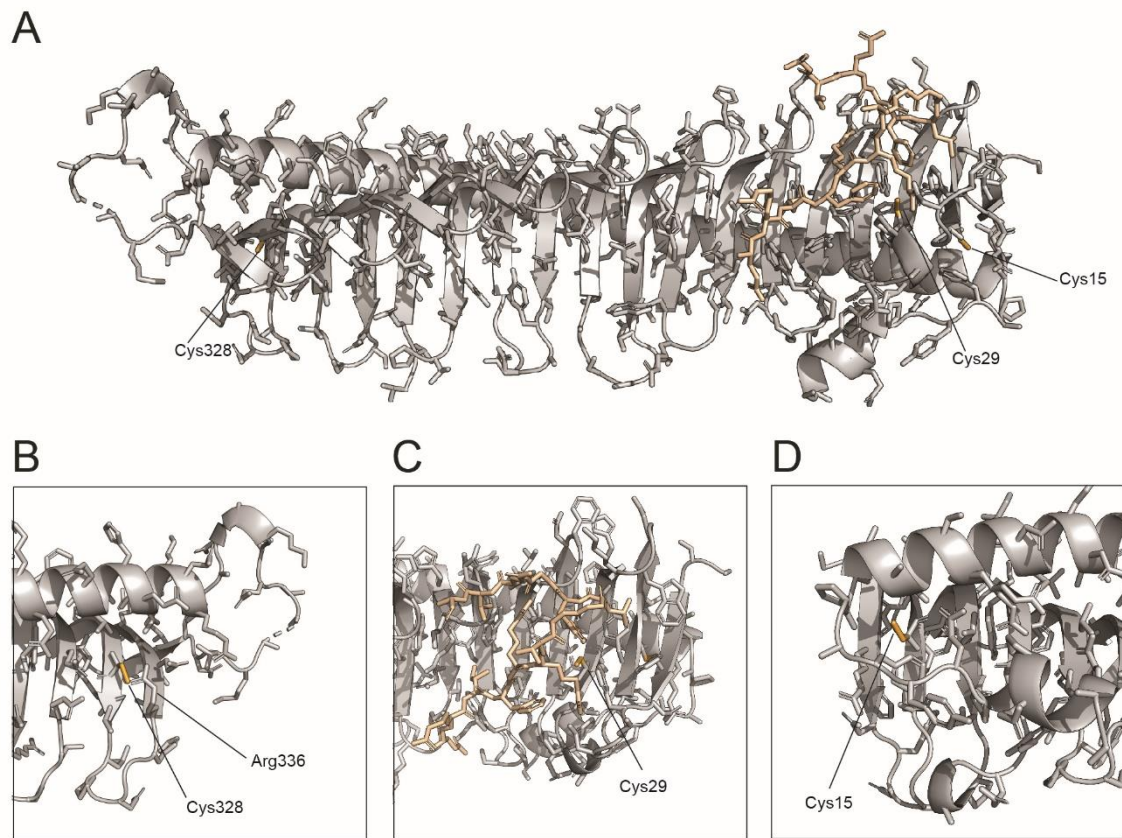

**Fig. S6: Potential palmitoylation sites on JPH2 are inaccessible.** (A) The JPH2 crystal structure with 3 potential palmitoylation sites: Cys15, Cys29, and Cys328. Cysteine sidechains are colored in orange; the Cav1.1 peptide is colored in beige. (B) Cys328 is buried by Arg336 and thus inaccessible with a calculated solvent accessible area of 0.0 Å<sup>2</sup> for the sulfhydryl group. (C) In the absence of a Cav1.1 peptide, the Cys29 sulfhydryl has a solvent accessible area of 25 Å<sup>2</sup>, which reduces to 9.8 Å<sup>2</sup> in the presence of the peptide. The presence of the peptide leaves no space for a bulky palmitate group (D) Cys15 is buried by the backbone α-helix with a solvent accessible area of 0.0 Å<sup>2</sup>. Contact areas are calculated with AREAIMOL in CCP4 with a probe solvent molecule with radius 1.4 Å.



**Table S1 Data collection, phasing and refinement statistics for JPH1 data**

|                                                     | Native JPH1<br>(PDB 7RW4)                     | Se-Met JPH1                                   |
|-----------------------------------------------------|-----------------------------------------------|-----------------------------------------------|
| <b>Data collection</b>                              |                                               |                                               |
| Space group                                         | P2 <sub>1</sub> 2 <sub>1</sub> 2 <sub>1</sub> | P2 <sub>1</sub> 2 <sub>1</sub> 2 <sub>1</sub> |
| Cell dimensions                                     |                                               |                                               |
| <i>a</i> , <i>b</i> , <i>c</i> (Å)                  | 44.08, 55.20, 142.45                          | 44.08, 55.20, 142.45                          |
| $\alpha$ , $\beta$ , $\gamma$ (°)                   | 90, 90, 90                                    | 90, 90, 90                                    |
| Wavelength (Å)                                      | 0.97937                                       | 0.97937                                       |
| Resolution (Å)                                      | 40.00-1.31 (1.34-1.31)                        | 40.00-1.65 (1.69-1.65)                        |
| <i>R</i> <sub>merge</sub>                           | 0.073 (1.097)                                 | 0.065 (0.763)                                 |
| <i>R</i> <sub>pim</sub>                             | 0.031 (0.542)                                 | 0.036 (0.448)                                 |
| <i>CC</i> <sub>1/2</sub>                            | 0.995 (0.502)                                 | 0.994 (0.619)                                 |
| <i>I</i> / $\sigma$ <i>I</i>                        | 23.96 (1.50)                                  | 18.35 (2.17)                                  |
| Completeness (%)                                    | 92.29 (33.27)                                 | 99.21 (96.02)                                 |
| Redundancy                                          | 6.3 (5.0)                                     | 3.8 (3.5)                                     |
| <b>Refinement</b>                                   |                                               |                                               |
| Resolution (Å)                                      | 37.48-1.31                                    |                                               |
| No. reflections                                     | 77976                                         |                                               |
| <i>R</i> <sub>work</sub> / <i>R</i> <sub>free</sub> | 0.1366 / 0.1680                               |                                               |
| No. atoms                                           |                                               |                                               |
| Protein                                             | 2496                                          |                                               |
| Ligand/ion                                          | 40                                            |                                               |
| Water                                               | 327                                           |                                               |
| <i>B</i> -factors                                   |                                               |                                               |
| Protein                                             | 18.31                                         |                                               |
| Ligand/ion                                          | 42.11                                         |                                               |
| Water                                               | 33.72                                         |                                               |
| R.m.s deviations                                    |                                               |                                               |
| Bond lengths (Å)                                    | 0.012                                         |                                               |
| Bond angles (°)                                     | 1.23                                          |                                               |

\*Values in parentheses are for highest-resolution shell.

**Table S2 Data collection and refinement statistics (molecular replacement)**

|                                                     | Apo-JPH2<br>(PDB 7RXE) | JPH2-Cav peptide complex<br>(PDB 7RXQ) |
|-----------------------------------------------------|------------------------|----------------------------------------|
| <b>Data collection</b>                              |                        |                                        |
| Space group                                         | P3 <sub>2</sub> 21     | C2                                     |
| Cell dimensions                                     |                        |                                        |
| <i>a</i> , <i>b</i> , <i>c</i> (Å)                  | 63.121, 63.121, 149.68 | 116.39, 30.38, 96.68                   |
| $\alpha$ , $\beta$ , $\gamma$ (°)                   | 90, 90, 120            | 90, 115.96, 90                         |
| Wavelength (Å)                                      | 0.97946                | 0.97946                                |
| Resolution (Å)                                      | 54.66-2.35 (2.48-2.35) | 44.34-2.03 (2.07-2.03)                 |
| <i>R</i> <sub>merge</sub>                           | 0.295 (1.435)          | 0.052 (0.225)                          |
| <i>R</i> <sub>pim</sub>                             | 0.105 (0.496)          | 0.034 (0.149)                          |
| <i>CC</i> <sub>1/2</sub>                            | 0.983 (0.371)          | 0.998 (0.950)                          |
| <i>I</i> / $\sigma$ <i>I</i>                        | 5.4 (1.5)              | 13.3 (1.8)                             |
| Completeness (%)                                    | 100.0 (100.0)          | 97.10 (97.71)                          |
| Redundancy                                          | 8.7 (9.2)              | 3.2 (3.2)                              |
| <b>Refinement</b>                                   |                        |                                        |
| Resolution (Å)                                      | 36.85–2.35             | 38.07–2.03                             |
| No. reflections                                     | 14993                  | 19586                                  |
| <i>R</i> <sub>work</sub> / <i>R</i> <sub>free</sub> | 0.2175 / 0.2606        | 0.2024 / 0.2517                        |
| No. atoms                                           |                        |                                        |
| Protein                                             | 2411                   | 2165                                   |
| Ligand/ion                                          | 38                     | 18                                     |
| Water                                               | 93                     | 127                                    |
| <i>B</i> -factors                                   |                        |                                        |
| Protein                                             | 37.98                  | 44.12                                  |
| Ligand/ion                                          | 43.53                  | 57.39                                  |
| Water                                               | 36.78                  | 38.08                                  |
| R.m.s. deviations                                   |                        |                                        |
| Bond lengths (Å)                                    | 0.006                  | 0.007                                  |
| Bond angles (°)                                     | 0.86                   | 0.90                                   |

\*Values in parentheses are for highest-resolution shell.

**Table S3:** Estimated molecular weight of JPH1 and JPH2 based on size-exclusion chromatography (SEC) and multi-angle light scattering (MALS).

| <b>Construct</b>    | <b>Estimated molecular weight based on SEC (kDa)</b> | <b>Estimated molecular weight based on MALS (kDa)</b> | <b>Molecular weight based on protein sequence (kDa)</b> |
|---------------------|------------------------------------------------------|-------------------------------------------------------|---------------------------------------------------------|
| JPH1(1-442)         | 51.9                                                 | 56.8                                                  | 49.8                                                    |
| JPH1(1-161,265-442) | 32.4                                                 | 35.0                                                  | 37.9                                                    |
| JPH2(1-437)         | 48.9                                                 | 40.1                                                  | 47.2                                                    |
| JPH2(1-161,275-437) | 35.6                                                 | 33.5                                                  | 36.1                                                    |

**Table S4. Affinity values for the binding between junctophilin MORN-helix domains and the CTD constructs of Cav1.1**

| Titrated constructs                                   | $K_d$ , $\mu\text{M}$ | N value         | $\Delta H$ , kcal<br>$\cdot\text{mol}^{-1}$ | $\Delta S$ , kcal<br>$\cdot\text{mol}^{-1}\text{K}^{-1}$ | No of<br>replicates |
|-------------------------------------------------------|-----------------------|-----------------|---------------------------------------------|----------------------------------------------------------|---------------------|
| Cav1.1 1594-1609/<br>JPH1 1-442                       | $7.7 \pm 0.3$         | $0.9 \pm 0.1$   | $-12.5 \pm 1.0$                             | $-18.7 \pm 3.2$                                          | 3                   |
| Cav1.1 1594-1609/<br>JPH1 1-175,265-442               | $1.1 \pm 0.2$         | $0.9 \pm 0.1$   | $-16.7 \pm 0.3$                             | $-28.7 \pm 1.4$                                          | 3                   |
| Cav1.1 1594-1609/<br>JPH2 1-161,275-437               | $1.7 \pm 0.3$         | $1.0 \pm 0.1$   | $-15.8 \pm 0.7$                             | $-26.6 \pm 2.6$                                          | 3                   |
| Cav1.1 1594-1609/<br>MBP-JPH2 1-161,275-437           | $1.8 \pm 0.2$         | $0.99 \pm 0.02$ | $-16.9 \pm 0.4$                             | $-30.2 \pm 1.4$                                          | 3                   |
| Cav1.1 1594-1609/<br>MBP-JPH2 1-161,275-<br>437(E47A) | $25.3 \pm 3.5$        | $1.0 \pm 0.1$   | $-14.3 \pm 0.5$                             | $-27.0 \pm 1.9$                                          | 3                   |

**Table S5. Cav1.1 conductance and calcium transient parameters**

| <b>Ca<sup>2+</sup> current parameters</b>    |               |                      |                |
|----------------------------------------------|---------------|----------------------|----------------|
| <b>Parameter</b>                             | <b>Cav1.1</b> | <b>Cav1.1-RRFAAA</b> | <b>p-value</b> |
| I <sub>peak</sub> (pA/pF)                    | -2.29 ± 0.33  | -1.78 ± 0.28         | 0.2708         |
| V <sub>rev</sub> (mV)                        | 82.59 ± 1.99  | 82.22 ± 2.26         | 0.9104         |
| V <sub>1/2</sub> (mV)                        | 26.18 ± 1.09  | 26.41 ± 4.5          | 0.9652         |
| G <sub>max</sub> (nS/nF)                     | 63.85 ± 8.01  | 54.97 ± 8.64         | 0.4867         |
| K <sub>act</sub> (mV)                        | 9.25 ± 0.32   | 11.28 ± 1.31         | 0.1999         |
| n                                            | 10            | 12                   | -              |
| <b>Ca<sup>2+</sup> transients parameters</b> |               |                      |                |
| <b>Parameter</b>                             | <b>Cav1.1</b> | <b>Cav1.1-RRFAAA</b> | <b>p-value</b> |
| ΔF/F <sub>max</sub>                          | 0.92 ± 0.17   | 0.52 ± 0.07          | 0.0385         |
| V <sub>F</sub> (mV)                          | 5.76 ± 2.16   | 5.87 ± 2.33          | 0.9744         |
| K <sub>F</sub> (mV)                          | 7.43 ± 1.06   | 5.76 ± 0.65          | 0.2001         |
| n                                            | 10            | 12                   | -              |

Average values of parameters obtained by fits of equations 1 and 2 (Material and methods) to I-V and ΔF/F-V data, respectively. Data are expressed as mean ± S.E. p-values are from Student t-test.

**Table S6.** Sequence Variants in Junctophilin-2, obtained from Clinvar and peer-reviewed literature. All H-bonds were determined via HBPLUS

| Sequence variant | Disease phenotype                                                                                             | Location of mutation              | Reference, if available | Predicted effect                                                                                     |
|------------------|---------------------------------------------------------------------------------------------------------------|-----------------------------------|-------------------------|------------------------------------------------------------------------------------------------------|
| G3E              | Not provided                                                                                                  | 1 <sup>st</sup> $\beta$ -strand   |                         | G3 occupies a location on the Ramachandran plot only allowed for Gly                                 |
| G20R             | Primary familial hypertrophic cardiomyopathy                                                                  | MORN 1                            |                         | Surface residue change                                                                               |
| G21E             | Hypertrophic cardiomyopathy                                                                                   | MORN1 (MORN consensus residue G8) |                         | Surface residue change                                                                               |
| G31D             | Hypertrophic cardiomyopathy                                                                                   | MORN1                             |                         | Surface residue change                                                                               |
| K33R             | Hypertrophic cardiomyopathy                                                                                   | MORN1                             |                         | Surface residue change                                                                               |
| N43S             | Cardiovascular phenotype, not specified, Hypertrophic cardiomyopathy, Familial hypertrophic cardiomyopathy 17 | MORN2                             |                         | Surface residue change                                                                               |
| E47A             | Hypertrophic cardiomyopathy                                                                                   | MORN2                             |                         | Affects packing against W42 in MORN2 and W64 in MORN3; affects salt bridge with CaV1.1 residue R1599 |
| P55A             | Hypertrophic cardiomyopathy                                                                                   | MORN2                             | De Bruijn et al(1)      | Affects packing against residue Y433 in backbone $\alpha$ -helix                                     |
| P55L             | Hypertrophic cardiomyopathy                                                                                   | MORN2                             |                         | Affects packing against residue Y433 in backbone $\alpha$ -helix                                     |
| G57R             | Not provided                                                                                                  | MORN2                             |                         | G57 occupies location on Ramachandran plot only allowed for Gly                                      |
| W64*             | Familial hypertrophic cardiomyopathy 17                                                                       | MORN3 (MORN consensus residue W5) |                         | Premature stop codon; truncated product                                                              |
| I74V             | Hypertrophic cardiomyopathy                                                                                   | MORN3                             |                         | Affects packing against E402 in backbone $\alpha$ -helix                                             |
| T76A             | Not provided, Familial hypertrophic cardiomyopathy 17                                                         | MORN3                             |                         | Surface residue change                                                                               |
| K77E             | Hypertrophic cardiomyopathy                                                                                   | MORN3                             |                         | Affects salt bridge with E75; affects salt bridge with Cav1.1 residue E1595                          |
| R93H             | Primary dilated cardiomyopathy, not provided                                                                  | MORN4                             |                         | Affects packing against T109; affects H-bond with W110 carbonyl oxygen                               |
| R97W             | Hypertrophic cardiomyopathy                                                                                   | MORN4                             |                         | Affects H-bond with Q115                                                                             |

|       |                                                                                                   |                                    |                                        |                                                                                                       |
|-------|---------------------------------------------------------------------------------------------------|------------------------------------|----------------------------------------|-------------------------------------------------------------------------------------------------------|
| R97Q  | Hypertrophic cardiomyopathy                                                                       | MORN4                              |                                        | Affects H-bond with Q115                                                                              |
| S100L | Not provided                                                                                      | MORN4                              |                                        | Affects H-bond with G78 carbonyl oxygen                                                               |
| S101R | Familial hypertrophic cardiomyopathy 17                                                           | MORN4                              | Landstrom et al(2)<br>Bennett et al(3) | Surface residue change                                                                                |
| G103S | Hypertrophic cardiomyopathy                                                                       | MORN4                              |                                        | Surface residue change                                                                                |
| G117C | Hypertrophic cardiomyopathy                                                                       | MORN5 (MORN Consensus residue G12) |                                        | G117 occupies a location in the Ramachandran plot only allowed for Gly                                |
| E121K | Hypertrophic cardiomyopathy                                                                       | MORN5                              |                                        | Affects H-bond with Q115 and H-bond with Y123                                                         |
| G126R | Not specified                                                                                     | MORN5                              |                                        | G126 occupies a location in the Ramachandran plot only allowed for Gly                                |
| Y129D | Not specified, Hypertrophic cardiomyopathy                                                        | MORN6 (MORN consensus residue Y1)  |                                        | Affects H-bond with Q132 mainchain and H-bond with Y141 carbonyl oxygen; affects packing against R138 |
| G136S | Hypertrophic cardiomyopathy                                                                       | MORN6 (MORN consensus residue G8)  |                                        | Surface residue change                                                                                |
| R138S | Not provided                                                                                      | MORN6                              |                                        | Affects H-bond with Y123 and H bond with D298 carbonyl oxygen; affects packing against Y129           |
| Y141H | Familial hypertrophic cardiomyopathy 17, Familial hypertrophic cardiomyopathy 1                   | MORN6                              | Landstrom et al(2)<br>Woo et al(4)     | Affects packing against D294 and I379 of backbone $\alpha$ -helix                                     |
| G142* | Not provided                                                                                      | MORN6 (MORN consensus residue G14) |                                        | Premature stop codon leading to truncated product                                                     |
| S146G | Hypertrophic cardiomyopathy                                                                       | MORN6                              |                                        | Affects H-bond with V147 carbonyl oxygen                                                              |
| S146R | Familial hypertrophic cardiomyopathy 1                                                            | MORN6                              |                                        | Affects H-bond with V147 carbonyl oxygen                                                              |
| V147M | Hypertrophic cardiomyopathy                                                                       | MORN6                              |                                        | Surface residue change                                                                                |
| P148L | Hypertrophic cardiomyopathy, Not provided                                                         | MORN6                              |                                        | Surface residue change                                                                                |
| G150R | Not provided, Hypertrophic cardiomyopathy                                                         | MORN6                              |                                        | Surface residue change                                                                                |
| V153A | Not specified, not provided, Familial hypertrophic cardiomyopathy 17, Hypertrophic cardiomyopathy | Joining region                     |                                        | Surface residue change                                                                                |

|       |                                                                                  |                |                   |                                                                                                        |
|-------|----------------------------------------------------------------------------------|----------------|-------------------|--------------------------------------------------------------------------------------------------------|
| R156C | Hypertrophic cardiomyopathy                                                      | Joining region |                   | Surface residue change                                                                                 |
| P158L | Hypertrophic cardiomyopathy                                                      | Joining region |                   | Surface residue change                                                                                 |
| L159Q | Cardiovascular phenotype, Hypertrophic cardiomyopathy                            | Joining region |                   | Surface residue change                                                                                 |
| T161K | Primary familial hypertrophic cardiomyopathy, Hypertrophic cardiomyopathy        | Joining region | Vanninen et al(5) | Affects H-bond with P158 carbonyl oxygen                                                               |
| A277S | Hypertrophic cardiomyopathy                                                      | Joining region |                   | Surface residue change                                                                                 |
| P278R | Hypertrophic cardiomyopathy                                                      | Joining region |                   | Surface residue change                                                                                 |
| E280K | Cardiovascular phenotype, not specified, Familial hypertrophic cardiomyopathy 17 | Joining region |                   | Surface residue change                                                                                 |
| A285D | Hypertrophic cardiomyopathy                                                      | Joining region |                   | Surface residue change                                                                                 |
| T290I | Hypertrophic cardiomyopathy                                                      | Joining region |                   | Affects H-bond with Q145; change in hydrophobicity at the surface                                      |
| T290S | Hypertrophic cardiomyopathy                                                      | Joining region |                   | Thr290 forms a H-bond with Q145; Ser290 may form the same H-bond                                       |
| M292T | Hypertrophic cardiomyopathy                                                      | MORN7          |                   | Affects packing against V143 and R381 of backbone helix                                                |
| K296T | Hypertrophic cardiomyopathy                                                      | MORN7          |                   | Surface residue change                                                                                 |
| R300P | Hypertrophic cardiomyopathy                                                      | MORN7          |                   | Affects ionic interaction with E289 and H-bond with N321                                               |
| S306G | Familial hypertrophic cardiomyopathy 17                                          | MORN7          |                   | Affects polar interaction with E289                                                                    |
| E307K | Not provided                                                                     | MORN7          |                   | Surface residue change                                                                                 |
| E315K | Cardiovascular phenotype                                                         | MORN8          |                   | Affects salt bridge, causing repulsion with R313; affects H-bond with Q374 of backbone $\alpha$ -helix |
| E315G | Not provided                                                                     | MORN8          |                   | Affects salt bridge, causing repulsion with R313; affects H-bond with Q374 of backbone $\alpha$ -helix |
| E317K | Hypertrophic cardiomyopathy                                                      | MORN8          |                   | Affects H-bond with Y326 amide nitrogen and S369 of backbone $\alpha$ -helix                           |
| R323H | Not provided                                                                     | MORN8          |                   | Affects H-bond with T329 and H-bond with N344                                                          |



|       |                                                                                                                                                 |                          |                                    |                                                                                                                    |
|-------|-------------------------------------------------------------------------------------------------------------------------------------------------|--------------------------|------------------------------------|--------------------------------------------------------------------------------------------------------------------|
| T329A | Not provided                                                                                                                                    | MORN8                    |                                    | Affects H-bond with R323 and H bond with Y341                                                                      |
| T329N | Hypertrophic cardiomyopathy                                                                                                                     | MORN8                    |                                    | Affects H-bond with R323 and H bond with Y341                                                                      |
| G339S | Cardiovascular phenotype, Hypertrophic cardiomyopathy                                                                                           | Pseudo MORN              |                                    | G339 occupies a location in the Ramachandran plot only allowed for Gly                                             |
| V345L | Hypertrophic cardiomyopathy                                                                                                                     | Pseudo MORN              |                                    | Surface residue change                                                                                             |
| R353C | Hypertrophic cardiomyopathy                                                                                                                     | Loop                     |                                    | Surface residue change                                                                                             |
| N360H | Familial hypertrophic cardiomyopathy 17, not provided                                                                                           | Loop                     |                                    | Affects H-bond with K365 of backbone $\alpha$ helix                                                                |
| K361N | Hypertrophic cardiomyopathy                                                                                                                     | Loop                     |                                    | Surface residue change                                                                                             |
| Q364* | Not provided, not specified                                                                                                                     | Backbone $\alpha$ helix  |                                    | Premature stop codon leading to truncated product                                                                  |
| S369T | Hypertrophic cardiomyopathy                                                                                                                     | Backbone $\alpha$ helix  |                                    | Affects H-bond with E317 in MORN8; affects H-bond with K365 and V366 carbonyl oxygens in backbone $\alpha$ -helix  |
| R375C | Hypertrophic cardiomyopathy                                                                                                                     | Backbone $\alpha$ -helix |                                    | Surface residue change                                                                                             |
| R381C | Hypertrophic cardiomyopathy                                                                                                                     | Backbone $\alpha$ -helix |                                    | Affects packing against M292 in MORN7                                                                              |
| K383N | Not provided                                                                                                                                    | Backbone $\alpha$ -helix |                                    | Surface residue change                                                                                             |
| S392N | Hypertrophic cardiomyopathy                                                                                                                     | Backbone $\alpha$ -helix |                                    | Surface residue change                                                                                             |
| A394T | Hypertrophic cardiomyopathy                                                                                                                     | Backbone $\alpha$ -helix |                                    | Alanine residue facing glycine valley formed by the MORN repeats; possible steric hindrance for a larger residue.  |
| E402K | Familial hypertrophic cardiomyopathy 17, not specified, not provided, Hypertrophic cardiomyopathy, Primary familial hypertrophic cardiomyopathy | Backbone $\alpha$ -helix |                                    | Affects salt bridge with K83 in MORN4                                                                              |
| Q403E | Hypertrophic cardiomyopathy                                                                                                                     | Backbone $\alpha$ -helix |                                    | Surface residue change                                                                                             |
| A405S | Hypertrophic cardiomyopathy Basal septal hypertrophic and diastolic dysfunction                                                                 | Backbone $\alpha$ -helix | Beavers et al(6)<br>Quick et al(7) | Alanine residue facing glycine valley formed by the MORN repeats; possible steric hindrance for any larger residue |
| A405T | Familial hypertrophic cardiomyopathy 17,                                                                                                        | Backbone $\alpha$ -helix | Seidelmann et al(8)                | Alanine residue facing glycine valley formed by the                                                                |

|       |                                                       |                          |                      |                                                                                                  |
|-------|-------------------------------------------------------|--------------------------|----------------------|--------------------------------------------------------------------------------------------------|
|       | Hypertrophic cardiomyopathy, Cardiovascular phenotype |                          |                      | MORN repeats; possible steric hindrance for any larger residue                                   |
| A407D | Hypertrophic cardiomyopathy                           | Backbone $\alpha$ -helix |                      | Surface residue change                                                                           |
| N409K | Primary dilated cardiomyopathy                        | Backbone $\alpha$ -helix |                      | Affects H-bond with E61 in MORN3 and H-bond with A405 carbonyl oxygen                            |
| S412C | Hypertrophic cardiomyopathy                           | Backbone $\alpha$ -helix |                      | Affects H-bond with S39 in MORN2                                                                 |
| I414L | Idiopathic dilated cardiomyopathy (DCM)               | Backbone $\alpha$ -helix | Miura et al(9)       | Affects packing against H26 in MORN1                                                             |
| I414V | Not provided                                          | Backbone $\alpha$ -helix |                      | Affects packing against H26 in MORN1                                                             |
| R416C | Not provided                                          | Backbone $\alpha$ -helix |                      | Affects salt bridge with E37 in loop between MORN1-2; affects H-bond with N413 of backbone helix |
| A423S | Hypertrophic cardiomyopathy                           | Loop                     |                      | Residue at the interface with MORN repeats                                                       |
| P424L | Hypertrophic cardiomyopathy                           | Loop                     |                      | Surface residue change                                                                           |
| Q428* | Primary dilated cardiomyopathy                        | Loop                     |                      | Premature stop codon leading to truncated product                                                |
| P431L | Not provided                                          | Short helix              |                      | Surface residue change                                                                           |
| R436C | Hypertrophic cardiomyopathy                           | Short helix              | Matsushita et al(10) | Surface residue change                                                                           |

**Table S7**

Human Cav1.1 sequence variants in the junctophilin interaction domain, obtained from the Clinvar and gnomAD databases.

| <b>Mutation</b> | <b>Disease</b>                                                                 | <b>Source</b> | <b>Allele Frequency</b> | <b>Predicted effect</b>                                                                                                                           |
|-----------------|--------------------------------------------------------------------------------|---------------|-------------------------|---------------------------------------------------------------------------------------------------------------------------------------------------|
| F1598L          | Not provided                                                                   | gnomAD        | 3.98e-6                 | Affects packing against JPH2 residue P32                                                                                                          |
| R1599P          | Not provided                                                                   | gnomAD        | 6.38e-5                 | Affects H-bond with JPH2 residue G45 carbonyl oxygen and salt bridge with E47; affects intra-chain H-bond with G1606 carbonyl                     |
| R1599Q          | Not provided                                                                   | gnomAD        | 2.48e-5                 | Affects H-bond with JPH2 residue G45 carbonyl oxygen and salt bridge with JPH2 residue E47; affects intra-chain H-bond with G1606 carbonyl oxygen |
| R1599W          | Malignant hyperthermia, susceptibility to, 5, Hypokalemic periodic paralysis 1 | Clinvar       | 3.19e-5                 | Affects H-bond with JPH2 residue G45 carbonyl oxygen and salt bridge with JPH2 residue E47; affects intra-chain H-bond with G1606 carbonyl oxygen |
| G1603A          | Not provided                                                                   | gnomAD        | 4.00e-6                 | G1603 occupies a location in the Ramachandran plot only allowed for Gly                                                                           |
| L1604M          | Not provided                                                                   | Clinvar       | 1.20e-5                 | Affects packing against JPH2 residues Y14 and W18                                                                                                 |
| G1606A          | Not Provided                                                                   | gnomAD        | 3.99e-6                 | G1606 occupies a location in the Ramachandran plot only allowed for Gly                                                                           |

**Table S8**

Human Cav1.2 sequence variants in the junctophilin interaction domain, obtained from the Clinvar and gnomAD databases. Given the similarity with the corresponding region in CaV1.1, the predicted effects are based on the assumption that these corresponding residues are involved in similar interactions as observed in the JPH2-CaV1.1 crystal structure.

| <b>Mutation</b> | <b>Disease</b>                                         | <b>Source</b> | <b>Allele frequency</b> | <b>Predicted effect</b>                                                                                                                           |
|-----------------|--------------------------------------------------------|---------------|-------------------------|---------------------------------------------------------------------------------------------------------------------------------------------------|
| I1743T          | Long QT Syndrome                                       | Clinvar       | 4.01e-6                 | Affects packing against JPH2 residues Y52, W54, and W64                                                                                           |
| R1745M          | Not provided                                           | gnomAD        | 4.02e-6                 | Affects H-bond with JPH2 residue G45 carbonyl oxygen and salt bridge with JPH2 residue E47; affects intra-chain H-bond with G1752 carbonyl oxygen |
| G1748S          | Long QT Syndrome; Brugada syndrome 3, Timothy syndrome | Clinvar       | 5.43e-5                 | G1748S occupies a location in the Ramachandran plot only allowed for Gly                                                                          |
| G1752S          | Long QT Syndrome                                       | Clinvar       | 9.47e-6                 | Affects packing against JPH2 residue F46                                                                                                          |
| H1754D          | Not provided                                           | gnomAD        | 4.53e-6                 | Surface residue change                                                                                                                            |

## SI References

1. S. De Bruijn *et al.*, A special case of hypertrophic cardiomyopathy with a differential diagnosis of isolated cardiac amyloidosis or junctophilin type 2 associated cardiomyopathy. *Acta clinica Belgica* **76**, 136-143 (2021).
2. A. P. Landstrom *et al.*, Mutations in JPH2-encoded junctophilin-2 associated with hypertrophic cardiomyopathy in humans. *Journal of molecular and cellular cardiology* **42**, 1026-1035 (2007).
3. H. J. Bennett *et al.*, Human junctophilin-2 undergoes a structural rearrangement upon binding PtdIns(3,4,5)P3 and the S101R mutation identified in hypertrophic cardiomyopathy obviates this response. *The Biochemical journal* **456**, 205-217 (2013).
4. J. S. Woo *et al.*, Hypertrophy in skeletal myotubes induced by junctophilin-2 mutant, Y141H, involves an increase in store-operated Ca<sup>2+</sup> entry via Orai1. *The Journal of biological chemistry* **287**, 14336-14348 (2012).
5. S. U. M. Vanninen *et al.*, Heterozygous junctophilin-2 (JPH2) p.(Thr161Lys) is a monogenic cause for HCM with heart failure. *PloS one* **13**, e0203422 (2018).
6. D. L. Beavers *et al.*, Mutation E169K in junctophilin-2 causes atrial fibrillation due to impaired RyR2 stabilization. *Journal of the American College of Cardiology* **62**, 2010-2019 (2013).
7. A. P. Quick *et al.*, Novel junctophilin-2 mutation A405S is associated with basal septal hypertrophy and diastolic dysfunction. *JACC. Basic to translational science* **2**, 56-67 (2017).
8. S. B. Seidelmann *et al.*, Application of Whole Exome Sequencing in the Clinical Diagnosis and Management of Inherited Cardiovascular Diseases in Adults. *Circulation. Cardiovascular genetics* **10** (2017).
9. A. Miura, H. Kondo, T. Yamamoto, Y. Okumura, H. Nishio, Sudden Unexpected Death of Infantile Dilated Cardiomyopathy with JPH2 and PKD1 Gene Variants. *International heart journal* **61**, 1079-1083 (2020).
10. Y. Matsushita *et al.*, Mutation of junctophilin type 2 associated with hypertrophic cardiomyopathy. *Journal of human genetics* **52**, 543-548 (2007).
